# Supplementary material
Source: Springer Nature journal article supplement (https://www.springermedizin.de/resource/supplementary/12889_2014_7165_MOESM1_ESM.pdf/9496918)
Supplement: MOESM1 [file 9496918]

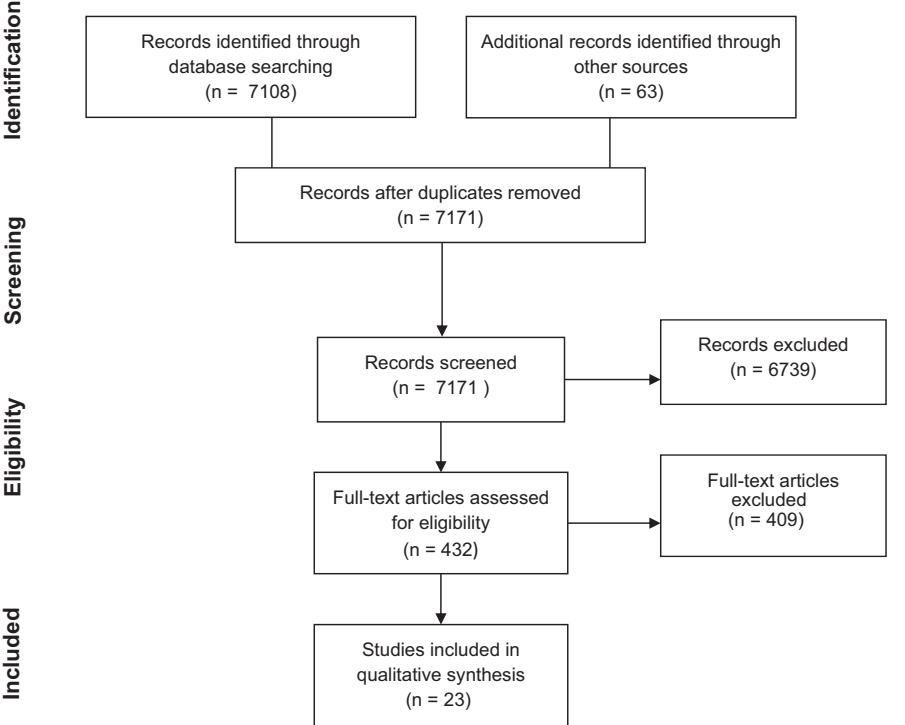

Flow diagram adapted from: Preferred Reporting Items for Systematic Reviews and Meta-Analyses:
